# Supplementary material
Source: PubMed Central journal article supplement (PMC6344286)
Supplement: NIHMS1514487-supplement-Major_Resources_Table.pdf [file NIHMS1514487-supplement-Major_Resources_Table.pdf]

## Major Resources Tables

### Animals

| Species/Strain    | Vendor or Source                              | Background Strain | Sex  |
|-------------------|-----------------------------------------------|-------------------|------|
| Cynomolgus monkey | Biomedical Research Foundation (Houston, TX)  |                   | Male |
| Mice /C57Bl/6     | Ralf Brandes University of Frankfurt, Germany |                   | Male |

### Antibodies

| Target antigen                         | Vendor or Source                    | Catalog # | Working concentration | Lot # (preferred but not required) |
|----------------------------------------|-------------------------------------|-----------|-----------------------|------------------------------------|
| ERK 1/2                                | Cell Signaling Technology           | 9102      | 1 µg/ml               |                                    |
| p-ERK 1/2                              | Cell Signaling Technology           | 9106      | 1 µg/ml               |                                    |
| P47phox                                | William Nauseef, University of Iowa |           |                       |                                    |
| P47phox                                | Merck                               | 07-500    | 1 µg/ml               |                                    |
| PDI                                    | Thermo Fisher Scientific            | MA3019    | 1 µg/ml               |                                    |
| Na <sup>+</sup> /K <sup>+</sup> ATPase | Merck                               | 06-520    | 1 µg/ml               |                                    |
| β-actin                                | Sigma                               | A-5441    | 1ng/ml                |                                    |
| p-Serine                               | Cell Signaling Technology           | 2981      | 1 µg/ml               |                                    |
| ERG                                    | Abcam                               | ab92513   | 1 µg/ml               |                                    |
| αSMA-Cy3                               | Sigma-Aldrich                       | C6198     | 1 µg/ml               |                                    |
| IRDye secondary 800 Anti-mouse         | Li-Cor                              | 926-32212 | 0.5ng/ml              |                                    |
| IRDye secondary 800 Anti-rabbit        | Li-Cor                              | 926-32213 | 0.5 ng/ml             |                                    |
| IRDye secondary 680 Anti-mouse         | Li-Cor                              | 926-68072 | 0.5 ng/ml             |                                    |
| IRDye secondary 680 Anti-rabbit        | Li-Cor                              | 926-68073 | 0.5 ng/ml             |                                    |

### Cultured Cells

| Name                       | Vendor or Source                            | Sex (F, M, or unknown) |
|----------------------------|---------------------------------------------|------------------------|
| Nox1 deficient aortic VSMC | Francis Miller, Duke University, Durham, NC | Male                   |
| C57/BL6 aortic VSMC        | Francis Miller, Duke University, Durham, NC | Male and Female        |
| Human Embryonic Kidney 293 | ATCC                                        | unknown                |

|                    |                                                     |         |
|--------------------|-----------------------------------------------------|---------|
| COS p22phox        | Mary Dinauer Washington<br>University, St.Louis, MO | unknown |
| Rabbit aortic VSMC | Francisco Laurindo,<br>University of São Paulo      | unknown |

### Plasmids

| Name                                  | Vendor or Source                                                   |  |
|---------------------------------------|--------------------------------------------------------------------|--|
| p47phox-roGFP                         | George G. Rodney, Baylor<br>College of Medicine,<br>Houston, Texas |  |
| PDI mutated in C53,C56,<br>C397, C400 | Francisco Laurindo,<br>University of São Paulo,<br>Brazil          |  |
| p47phox C196A                         | Francis Miller, University of<br>Iowa                              |  |
| p47phox C378A, C196/378A              | Lucia Rossetti Lopes,<br>University of São Paulo,<br>Brazil        |  |
| p67phox                               | William Nauseef,<br>University of Iowa                             |  |
| p47phox                               | William Nauseef,<br>University of Iowa                             |  |
| NoxA1                                 | Botond Banfi, University of<br>Iowa                                |  |
| NoxO1                                 | Botond Banfi, University of<br>Iowa                                |  |
| Nox1                                  | Botond Banfi, University of<br>Iowa                                |  |
